1 **Effects of background food on alternative grain uptake and zinc phosphide efficacy in wild house**

2 **mice**

3

4 Running title: Alternative grains and zinc phosphide efficacy in wild mice

5

6 Steve Henry, Peter R. Brown, Nikki Van de Weyer, Freya Robinson and Lyn A. Hinds

7

8 *CSIRO Health and Biosecurity, GPO Box 1700, Canberra, ACT, 2601, Australia*

9

10 Corresponding author: [Peter.Brown@csiro.au](mailto:Peter.Brown@csiro.au)

11

12

13 For submission to: *Pest Management Science*

14

15 Peter R. Brown: 0000-0001-5894-8329

16 Nikki Van de Weyer: 0000-0002-8659-4369

17 Freya Robinson: 0000-0002-8598-2466

18 Lyn A. Hinds: 0000-0002-4125-2357

19

20

21

22 **Abstract**

23 **BACKGROUND:** House mice (*Mus musculus*) cause significant, ongoing losses to grain crops in  
24 Australia, particularly during mouse plagues. Zinc phosphide (ZnP) coated grain is used for control,  
25 but with variable success. In a laboratory setting, we tested if mice would (1) switch from  
26 consumption of one grain type to another when presented with an alternative, and (2) consume ZnP-  
27 treated grains when presented as a choice with a different grain.

28 **RESULTS:** Mice readily switched from their background grain to an alternative grain, preferring  
29 cereals (wheat or barley) over lentils. Mice readily consumed ZnP-coated barley grains. Their  
30 mortality rate was significantly higher (86%, n=30) in the presence of a less-favoured grain (lentils)  
31 compared to their mortality rate (47%, n=29; and 53%, n=30) in the presence of a more-favoured  
32 grain (wheat and barley, respectively). Mice died between 4-112 h (median = 18 h) after consuming  
33 one or more toxic grains. Independent analysis of ZnP-coated grains showed variable toxin loading  
34 indicating that consumption of a single grain would not guarantee intake of a lethal dose. There was  
35 also a strong and rapid behavioural aversion if mice did not consume a lethal dose on the first night.

36 **CONCLUSIONS:** The registered dose rate of 25 g ZnP/kg wheat; ~ 1 mg ZnP/grain in Australia needs to  
37 be re-evaluated to determine what factors may be contributing to variation in efficacy. Further field  
38 research is also required to understand the complex association between ZnP dose, and quantity and  
39 quality of background food on efficacy of ZnP baits.

40

41 **Keywords:** rodenticide; control; *Mus musculus domesticus*; bait substrate; food preference; zinc  
42 phosphide

43

44 **1 INTRODUCTION**

45

46 Wild house mice (*Mus musculus domesticus*) cause ongoing and significant problems in grain growing  
47 areas of Australia [1]. The primary impact of mice is through damage to crops leading to major

48 economic losses, with damage being particularly acute during mouse plague events that can occur  
49 every three to five years with resultant losses exceeding \$100 million [1,2,3,4,]. Mice also cause  
50 serious damage to intensive livestock and horticulture industries, significant social and  
51 environmental damage throughout rural communities through damage to houses, infrastructure and  
52 equipment [2], and are a source of zoonotic diseases [5]. Effective management is required to  
53 minimise the economic impact caused by mice.

54 In Australia, acute rodenticides, such as strychnine and zinc phosphide ( $Zn_3P_2$ ; herein ZnP),  
55 have been used extensively to manage mouse problems in grain-growing regions [6]. In 1996, ZnP  
56 was proposed for use in Australia to replace strychnine as a broad-acre rodenticide for control of  
57 mouse populations [7] and to reduce non-target impacts. In May 2000, ZnP-coated wheat grain  
58 became the only registered in-crop rodenticide bait (APVMA, <https://apvma.gov.au/node/14101>) for  
59 the management of over abundant mice in broad scale crops in Australia [6,8,9]. For the registered  
60 rate of 25 g ZnP/kg wheat bait there is approximately 1 mg ZnP per grain of wheat, meaning  
61 theoretically that a single grain is equal to one lethal dose for a 20 g mouse [10]. ZnP bait is applied at  
62 1 kg per hectare resulting in approximately 2-3 grains of bait per square metre. Zinc phosphide is  
63 commonly used to control rodent pests in many countries in a range of crops, not just broadacre  
64 grain crops, including sugarcane [11], alfalfa [12], coconut [13,14], rice [14,15,16], and fields and  
65 forests [17,18]. The applicability and use of ZnP baits across a range of crop types is well illustrated.

66 The effectiveness of ZnP baits has been highly variable, however, with field studies reporting  
67 between 50% to 95% efficacy [8,9,19,10]. When mouse abundance is high and mouse damage is  
68 likely, particularly at sowing of crops, growers will often contravene label rates (applying baits at  
69 rates > 1 kg/ha) or repeatedly apply baits at short intervals (Henry S and Brown PR, unpublished).  
70 This bait application misuse might also contribute to poor efficacy because of behavioural avoidance  
71 from sub-lethal doses. Other reasons for variability in efficacy could be related to the bait substrate  
72 used and the quantity and/or quality of alternative food available.

73            Significant changes in farming systems over the past 20 years may also be contributing to the  
74 reported changes in the efficacy of ZnP. Before 2002, conventional cropping systems followed a  
75 three-to four-year crop rotation, this involved numerous passes with ploughing equipment to control  
76 weeds, seed bed preparation and leaving fields fallow in the year prior to planting the next crop. The  
77 adoption of conservation agriculture (CA) systems (also known as zero or no-till cropping systems)  
78 involves retaining stubble, using herbicides to control weeds and practicing single-pass sowing with  
79 disc or narrow tyne to minimise soil disturbance [21]. This has created an environment that is more  
80 favourable for mice than conventional cropping systems [22]. In contrast to conventional cropping  
81 systems, the habitat in CA systems is more complex with crops growing in amongst crop residue and  
82 standing stubble, and in some years high levels of residual grain from the previous crop remaining on  
83 the ground. This complexity also means that the ability of mice to detect ZnP bait spread at 1 kg/ha  
84 (approximately 3 grains/m<sup>2</sup>) may be reduced when compared to conventional systems where all crop  
85 residues are buried by tillage and bait is spread onto bare soil.

86            Zinc phosphide is currently coated onto wheat grains. Frequent anecdotal reports of poor  
87 effectiveness of ZnP make it worth exploring whether an alternative to wheat as a bait substrate  
88 should be considered to improve palatability and/or efficacy, especially given complex CA cropping  
89 systems with a wide range of crop types (Henry S and Brown PR, unpublished). There have been  
90 many studies directed at feeding preferences of house mice, because it is critical to have a bait that  
91 rodents will eat. Robards and Saunders [23] reported that house mice preferred soft wheat varieties,  
92 canary seed (*Phalaris canariensis*) and rice (*Oryza sativa*), noting however, that canary seeds are  
93 relatively small and would be impractical for use in field conditions. Rowe et al. [24] conducted food  
94 preference trials for the development of poison baits for mice and found that canary seed, pinhead  
95 oatmeal and wheat were well accepted by mice. Pennycuik and Cowan [25] used a small maze to  
96 determine odour preferences and showed that mice preferred canary seed or maize rather than a  
97 control diet of mouse breeder pellets. A further study examining flavour preferences among wheat  
98 varieties indicated mice had preferences for hard white spring wheat varieties over hard red spring

99 wheat varieties [26]. Other recent work has successfully investigated volatile food attractants to  
100 improve baits for trapping rodents (e.g.: [27]). Overall, the choice of food by mice appears to be  
101 dependent on its palatability and particle size.

102 The objective of this study was to identify an alternative grain type to wheat that may be  
103 more attractive, readily detected and palatable to mice in the presence of background food, as might  
104 be found in complex habitats associated with CA cropping systems. Commercial ZnP is currently  
105 mixed on wheat grains, but could the use of alternative grains, such as high protein, hard wheat  
106 (durum), malt barley or lentils, be more attractive to mice? Attractiveness might be important  
107 especially when bait is applied in the presence of different background food types (i.e. previous crop  
108 type). We addressed two questions in this laboratory study: (1) Do mice switch from consumption of  
109 a background grain type when presented with a choice of an alternative grain type? (2) Do mice  
110 consume the alternative grain type when it is coated with ZnP and presented as a choice with  
111 different background grains? The identification of alternative, palatable grain bait substrates could  
112 provide growers and the grains industry with a selection of substitutes to wheat and could improve  
113 management of house mice in crops.

114

## 115 **2 METHODS**

116

### 117 *2.1 Animals*

118

119 Wild house mice were trapped in cropping paddocks near Walpeup in the Central Mallee of Victoria  
120 (35°06'S, 142°01'E). Single capture Longworth traps (Longworth, Abingdon, UK) were set adjacent to  
121 a wheat stubble paddock and trapped mice were weighed, sexed and checked for alertness and  
122 general body condition. Only healthy adult mice (n = 90) were transported to an animal holding  
123 facility at CSIRO in Canberra, ACT, Australia. Mice were individually housed in mouse cages (L x W x  
124 H, 26 x 40 x 20 cm) containing wood shavings for bedding, tissue for nesting material, a cardboard

125 tube for shelter, and *ad libitum* food and water. Mouse cages were placed on racks in a temperature-  
126 controlled room ( $22^{\circ}\text{C} \pm 3^{\circ}\text{C}$ ) and lights were set at 12 h Light: 12 h Dark (On at 0600 h and off at  
127 1800 h each day). Mice were acclimatised to facility conditions for two weeks while on a  
128 maintenance diet of standard laboratory mouse pellets (Gordon's Specialty Stock Feeds, NSW)  
129 before and between Experiments 1 and 2. The trapping and use of animals in experiments was  
130 approved by the CSIRO Wildlife and Large Animal - Animal Ethics Committee, Approval No. 2018-22.

131

## 132 2.2 *Experimental design*

133

134 The same mice were used for the two experiments. We define 'background' food as the maintenance  
135 food provided to mice (as a reflection of naturally available food sources available in fields),  
136 'alternative' food or grain as a food substance which is provided to mice as an alternative challenge  
137 food type to the background food, and 'substrate' in reference to the grain type that carries toxic  
138 grains. The aim of Experiment 1 was to identify food preferences of house mice given an alternative  
139 grain choice in the presence of different background grain types. The results would establish  
140 potential alternative bait substrate candidates for use in Experiment 2 which aimed to determine the  
141 willingness of mice to consume different toxic ZnP-coated grains in the presence of a single  
142 alternative grain type.

143

## 144 2.3 *Experiment 1: Do mice switch their consumption of a background grain type when presented* 145 *with the choice of an alternative grain type?*

146

147 Following the initial acclimation period, mice were randomly allocated by weight and sex into three  
148 treatment groups, ( $n = 30$  mice per group, Table 1) and their diet of laboratory pellets was replaced  
149 with a background grain, either common wheat, barley or lentils *ad libitum*, for two weeks (Table 2).  
150 These three grain types putatively may be more attractive due to a higher protein or sugar content

151 (Table 2) and are able to be distributed using a standard bait spreader. The grains are also  
152 representative of those that mice commonly encounter in the Victorian and South Australian  
153 cropping regions. After two weeks on background grain, each group of 30 mice were further sub-  
154 divided into three groups (n = 10 mice per group, 5 males, 5 females), balanced by body weight  
155 (12.8-18.0 g females; 11.5-20.0 g males), to establish nine groups of mice.

156

157 Insert Table 1 here

158

159 Insert Table 2 here

160

161 For the next five days the nine groups of mice were provided with a choice of their  
162 background grain and an alternative grain type, either durum wheat, malt barley with husk or lentils  
163 (Table 1). The amount of each grain offered equated to approximately 10% by body weight. The  
164 different grains were dyed either red or green using a tasteless, odourless food dye (Queen Fine  
165 Foods, food colouring) to facilitate sorting of remaining grains each day to determine amount  
166 consumed.

167 During the 5-day experimental period each mouse cage contained only a cardboard shelter  
168 tube and two food dishes, one on each side of the cage and secured to the cage floor using “Blu  
169 Tack” (Bostik Australia Pty Ltd, Thomastown, Victoria, Australia) to minimise spillage. Each morning  
170 between 0800 h and 1030 h mice were removed from their cage and weighed. Cages were cleaned  
171 and remaining grain was sorted based on colour and dried in a drying oven at 40°C for 24 h. At 1600  
172 h food dishes containing a known amount of each grain (at least 10% body weight) were added. The  
173 position of each grain type was reversed daily to prevent mice habituating to a particular food dish.

174 Control food dishes (n = 6) holding each grain type were set up in an empty cage with  
175 attached water bottle and placed on racks adjacent to trial animals. The following morning control  
176 samples were dried at 40°C for 24 h. Changes in control grain weight (gain or loss) were used as a

177 correction factor when calculating the amount of grain consumed by trial mice. The amount of each  
178 grain type eaten each day was calculated by subtracting the amount remaining (weight corrected  
179 after drying for 24 h), from the original amount of food provided.

180

181 *2.4 Experiment 2: Do mice consume the alternative grain type when it is coated with ZnP and*  
182 *presented as a choice with different background grains?*

183

184 At the conclusion of Experiment 1, all mice were returned to a diet of standard laboratory mouse  
185 pellets for two weeks. The original three groups of 30 mice were then allocated to a different  
186 background grain type for a further two weeks prior to the commencement of Experiment 2. Each  
187 mouse cage was set-up with a shelter tube and two secured food dishes as described previously for  
188 Experiment 1.

189 Experiment 2 was conducted over six days. For three days, at 1600 h, animals were provided  
190 with their background grain type (at least 10% body weight) in one food dish, and ZnP-coated grains  
191 (n = 10) in the other food dish (Table 3). As in Experiment 1, the location of the food types in the cage  
192 was reversed each day. ZnP-coated grains were prepared independently according to the registered  
193 commercial application rate (25 g ZnP/kg).

194

195 Insert Table 3 here

196

197 The results for Experiment 1, indicated mice had a slight but not significant preference for  
198 malt barley over lentils and durum wheat. However, during Experiment 1 mice offered a grain in a  
199 husk (barley or malt barley) were observed removing the husk prior to consumption of the grain. This  
200 raised concerns about using husked grain as an alternative bait substrate, as the ZnP mixture is  
201 coated on the outside of the grain and by de-husking the grain the mice may not consume a lethal  
202 dose of ZnP. Therefore, barley with the husk, malt barley with the husk, and malt barley without the



203 husk were coated with ZnP for testing in Experiment 2 to determine if the husk made a difference to  
204 the effectiveness of the bait (Table 3).

205           Following addition of the toxic and non-toxic grains, mice were monitored every 30 minutes  
206 for six hours (1600-2200 h). The number of ZnP-coated grains consumed, and the activity and  
207 condition of each mouse was recorded. Mice showing clinical signs of ZnP poisoning (moribund, loss  
208 of hindquarter function, lateral or sternal recumbency) were humanely killed using an overdose of  
209 isoflurane (Laser Animal Health, Pharmachem, Eagle Farm Queensland). The time to death (humane  
210 killing) from addition of toxic grains was recorded. For mice that did not display signs of ZnP  
211 poisoning by 2200 h, hourly monitoring re-commenced the following morning from 0700 h. At 1600 h  
212 each day, any remaining ZnP grains (whole or partially consumed) were counted and replaced with  
213 10 new toxic ZnP grains. Remaining background food was removed and dried at 40°C for 24 h before  
214 being weighed. Control grains (n = 6 replicates) were set up as in Experiment 1 and used as a  
215 correction factor for moisture loss of grains. Any animal still alive three days after initial presentation  
216 with toxic ZnP grains was checked twice daily for a further three days, then humanely killed.

217

## 218 2.5 *Analysis of ZnP on grains*

219

220 A sample of ZnP-coated grains (n = 10) and uncoated grains (n = 10) of each grain type were analysed  
221 by Agrifood Technology, Werribee, Victoria. Individual grains were weighed into a digestion tube and  
222 5 ml nitric acid added. Each tube was sealed and placed in the MARS microwave digestion unit and  
223 digested at 170°C under pressure. Once cooled the sample was diluted to 20 ml, filtered and  
224 analysed using the Inductively Coupled Plasma Excitation (AS 3641.2 – 1999) method. A standard  
225 calibration curve was prepared using six standards. Blank samples were included as well as a spiked  
226 reference wheat sample to determine recoveries of Phosphorous (P) (99%) and Zinc (Zn) (101%).  
227 Continuous Calibration Verification and Quality Controls were included after every 10 samples and at

228 the end of the sequence and were found to be within specifications ( $\pm 10\%$ ). Any samples greater  
229 than the calibration range were diluted to within the range and re-run.

230

## 231 2.6 Statistical Analysis

232

233 For Experiment 1, for each grain type the amount consumed was calculated as the difference  
234 between the amount provided and that remaining after correcting for changes in moisture. The  
235 proportion of each alternative grain and background grain consumed by individual mice each day  
236 (days one to five) was calculated. A value of “0” indicates strong preference to background grain,  
237 “0.5” indicates no preference and “1” indicates strong preference for alternative grain. Some values  
238 were negative due to potential moisture correction error, to deal with this any negative values were  
239 adjusted to equal zero. All data were then transformed  $((Y \times (\text{length}(Y) - 1) + 0.5) / \text{length}(Y))$ , where  $Y$   
240 is the proportion of alternative grain taken) to account for real zero values prior to a logit  
241 transformation.

242 A linear mixed effect model in R (R version 1.1.456, [28]) using the *lmer* function in the *lme4*  
243 package [29] was used to examine differences in the logit transformed proportion of alternative grain  
244 take as the dependent variable between treatment groups. The data were modelled with each  
245 combination of background grain type and day as fixed effect factors, and individual animals nested  
246 in treatments as random effect factors. Confidence intervals (CI) were extracted from the model  
247 using the *confint* function and back transformed. The overlap in confidence intervals at a 95%  
248 confidence level were used to evaluate effect size of alternative grain consumption for each  
249 treatment group. Confidence intervals (CI) are reported as 95% CI [LL, UL], where LL is the lower limit  
250 of the CI and UL is the upper limit. Values reported in figures are extracted from the model using the  
251 *fixef* function and back transformed to real values.

252 For Experiment 2, linear regression models in R (R Core Team 2020) were used to compare  
253 the number of toxic grains consumed for each combination of toxic grain type, background grain

254 type, night, and percent mortality with individual animals as random effect factors. Reported  $F$ -  
255 values and  $P$ -values were obtained by an analysis of variance (ANOVA) of the fitted linear regression  
256 models. Means are reported  $\pm 1$  standard deviation (SD) throughout.

257

### 258 **3 RESULTS**

259

#### 260 *3.1 Experiment 1: Do mice switch their consumption of a background grain type when presented* 261 *with choice of an alternative grain type?*

262

263 When mice were provided with the different background grain types (lentils, barley with husk or  
264 wheat) they maintained their body weight (Females:  $14.8 \pm 1.2$  g; Males:  $16.2 \pm 2.2$  g) and general  
265 body condition.

266 When provided with the choice of an alternative grain type (durum, malt barley with husk or  
267 lentils), the background grain type strongly influenced the proportion of alternative grain consumed  
268 by mice (Figure 1). There was no difference in the proportion of the alternative grain consumed  
269 between days one to five for any treatment group ( $F_{4, 404} = 1.44$ ,  $P = 0.22$ ).

270

271 Insert Figure 1 here

272

273 Mice established on a lentil background and then offered an alternative grain of malt barley  
274 with husk (Figure 1a) or durum wheat (Figure 1b) switched to the alternative grain on night one (malt  
275 barley mean proportion = 0.91, 95% CI [0.80, 0.97]; durum wheat mean = 0.97, 95% CI [0.93, 0.99])  
276 and maintained that switch for the next four nights. Mice offered lentils as their alternative grain  
277 showed no preference (mean = 0.71, 95% CI [0.47, 0.87]) over the five treatment nights (Figure 1c),  
278 indicating that the position of the food dishes in the cage did not influence the choice of grain  
279 consumed.

280 Mice established on a barley with husk background tended to display an increasing  
281 preference towards alternative grain of malt barley with husk (Figure 1d) and durum wheat (Figure  
282 1e), although they did not completely switch to the alternative malt barley (mean = 0.53, 95% CI  
283 [0.29, 0.75]), or durum wheat (mean = 0.48, 95% CI [0.25, 0.71]). When offered lentils as the  
284 alternative grain (Figure 1f), a strong preference towards the background barley with husk was  
285 observed (mean = 0.009, 95% CI [0.003, 0.02]).

286 No preference was observed for mice established on a wheat background. When offered  
287 alternative malt barley with husk, mice consumed similar proportions of both grain types (mean =  
288 0.62, 95% CI [0.37, 0.81]; Figure 1g). Mice offered durum wheat (Figure 1h) or lentils (Figure 1i) as  
289 their alternative grain did not switch and maintained greater consumption of their background wheat  
290 (durum wheat mean = 0.21, 95% CI [0.09, 0.41]; mean = 0.04, lentils 95% CI [0.01, 0.10]).

291

292 *3.2 Experiment 2: Do mice consume the alternative grain type when it is coated with ZnP and*  
293 *presented as a choice against different background grains?*

294

295 During the first night of the trial, all mice consumed background grain. For mice on  
296 background lentils, barley with husk and wheat, consumption was  $4.9 \pm 3.3$ ,  $9.7 \pm 4.7$  and  $10.5 \pm 4.5$   
297 % of their body weight, respectively.

298 Mice consumed toxic ZnP grains regardless of grain type used. Most mice ( $n = 87/90$ )  
299 consumed at least one toxic ZnP grain within 30-120 minutes of addition to the cage on the first  
300 night. Only one mouse, on a wheat background, did not consume any toxic ZnP grains on any of the  
301 three nights they were offered. The number of toxic ZnP grains consumed on the first night by  
302 individual mice ( $n = 87$ ) across all treatment groups was  $4.6 \pm 3.2$  grains (min = 0, max = 10, median =  
303 4 grains). The average number of toxic grains consumed by individual mice ( $n = 89$ ) over the three-  
304 night trial was  $4.9 \pm 3.2$  grains (min = 0, max = 14, median = 4 grains). Consumption of toxic grains by  
305 mice was strongly influenced by their background grain type ( $F_{2, 167} = 31.6$ ,  $P < 0.001$ ; Figure 2). On

306 the first night of exposure to toxic ZnP grains, mice on a lentil background consumed  $7.3 \pm 2.5$  toxic  
307 grains (min = 3, max = 10, median = 6.5 grains), while mice on a barley background consumed fewer  
308 toxic grains ( $4.5 \pm 2.9$ ) (min = 1, max = 10, median = 3.5 grains), and those on a wheat background  
309 consumed  $2.1 \pm 1.6$  grains (min = 0, max = 7, median = 2 grains). However, there was no difference  
310 between the number or type of toxic ZnP grains consumed by mice for each of the background grain  
311 type groups ( $F_{4,167} = 1.8, P = 0.12$ ).

312

313 Insert Figure 2 here

314

315 Mortality (%) was strongly related to the number of ZnP-coated grains consumed ( $F_{1, 54} =$   
316  $17.6, P = 0.0001$ ). Of 10 mice that consumed one ZnP-coated grain, four died (40%). For the 45 mice  
317 that consumed between one and four ZnP-coated grains, 18 (40%) died, whereas of the 44 mice that  
318 consumed more than four ZnP-coated grains, 38 died (86.4%). The highest mortality (86%) occurred  
319 for mice established on a lentil background (Table 4). Three mice, all on a lentil background  
320 consumed nine, 10 and 14 ZnP-coated grains but did not die. Across all background grain types, the  
321 time to death after consumption of toxic grains for 54 animals ranged between 4 and 66 h ( $21.2 \pm$   
322  $12.48$  h; median = 18 h). Two other animals died at 87 and 112 h, respectively. Overall, 48 animals  
323 (85.7%) died within 30 h of exposure to ZnP-coated grains, while eight animals (14.3%) died between  
324 39 and 112 h.

325

326 Insert Table 4 here

327

328 For all background grain types, some mice did not die after consuming toxic ZnP grains on  
329 the first night of exposure. Each of these mice showed a significant decrease in consumption of toxic  
330 ZnP grains on subsequent nights ( $F_{2, 99} = 37.8, P < 0.001$ ; Figure 3a). Consumption of background grain  
331 increased by night three for all surviving mice in all treatment groups ( $F_{2, 99} = 7.3, P = 0.001$ ; Figure 3b).

332

333

Insert Figure 3 here

334

335 *3.3 Toxic ZnP grain analysis*

336

337 The amount of ZnP on individual grains (n = 30) varied between 0.47 and 1.95 mg ZnP/grain, with an  
338 overall average of  $0.93 \pm 0.4$  mg ZnP/grain (Figure 4). For each bait substrate there was an average of  
339  $1.26 \pm 0.4$ ,  $0.78 \pm 0.4$  and  $0.75 \pm 0.2$  mg ZnP/grain for barley with husk, malt barley without husk and  
340 malt barley with husk, respectively (Figure 4). No ZnP was detected on uncoated grains (n = 30).

341

342

Insert Figure 4 here

343

#### 344 **4 DISCUSSION**

345

346 Our laboratory-based study has shown that wild house mice readily switched from a background  
347 food to an alternative food and preferred cereals (wheat or barley) over lentils. The preference by  
348 house mice for wheat grains is known [23,24,26], but our results indicated that barley was equally  
349 favoured. Robards and Saunders [23] included barley in two of 22 pen experiments where different  
350 combinations of four choices of grains were offered and found that it performed poorly. Our results  
351 showed that it did not matter what single type of background food mice were exposed to, they  
352 readily switched to an alternative food on the first night of presentation. Given the neophilic  
353 behaviour of mice [30], this is not unexpected. We are not aware of instances where this rapid  
354 switching has been reported in the literature for house mice. The background grain type strongly  
355 influenced the proportion of alternative grain consumed by mice. If mice had an alternative food  
356 type, they avoided lentils. Robards and Saunders [23] found that mice preferred soft wheat varieties  
357 over hard varieties. We also observed this in that mice preferred common wheat, a softer grain, to

358 the harder durum wheat variety. Given that there was no difference between wheat and barley grain  
359 consumption, barley (malted, with or without husk on) may be a suitable alternative to sterilised  
360 wheat as a grain for addition of ZnP in commercial products, but there was no clear advantage over  
361 wheat.

362 This study clearly showed mice consumed toxic ZnP barley grains regardless of the type  
363 (barley with husk, malted barley without husk or malted barley with husk). When a less-favoured  
364 background grain was available (lentils), the mortality rate of mice was much higher (86%) compared  
365 to when a more-favoured background cereal grain, either barley or wheat, was available (mortality of  
366 53% and 47% respectively). This finding suggests that the type of background food was important in  
367 determining the choice made by mice when an alternative (toxic bait) grain was made available.  
368 Determining an alternative grain for use as a bait in those crops that are more favourable to mice  
369 warrants further study. Although there was no apparent difference in mortality rates for the  
370 different ZnP-coated barley grains, the type of background food was important in determining the  
371 choice made by the mice when a new alternative, albeit toxic, grain was made available.

372 Our results clearly showed that consumption of a single ZnP-coated grain was not always  
373 lethal, and even consumption of up to four ZnP-coated grains did not lead to death for 40% mice.  
374 This is despite the coating of ZnP on grains being approximately 1 mg which equates to an LD<sub>90</sub> dose  
375 for mice [31]. However, some coated grains had as little as ~0.5 mg ZnP/grain while others had up to  
376 almost 2 mg ZnP/grain. The results suggest that at the mixing rate of 25 g ZnP/kg grain, on average,  
377 most mice would need to consume more than one toxic grain and perhaps more than four toxic  
378 grains before receiving a lethal dose. This could explain the low efficacy of ZnP baiting being reported  
379 in the field, especially if baiting occurred in the presence of abundant, more-favoured, background  
380 food. Further research is required to assess the lethal dose rate of ZnP for Australian house mice as it  
381 appears from our findings that the lethal dose rate is likely much higher than 25 g ZnP/kg grain.

382 In addition, there was a strong and rapid behavioural aversion in mice which did not  
383 consume a lethal dose on the first night of exposure to ZnP-coated grains. These mice rapidly

384 switched back to eating their background food, a response which confirms the concern that mice  
385 become bait shy if they eat a sub-lethal dose of ZnP [32], but not how rapidly aversion occurs. This  
386 parallels the rapid decline in consumption of toxic ZnP bait also observed in common voles, *Microtus*  
387 *arvalis*, after their first night of exposure [17]. The likelihood of any bait shyness compounds the  
388 importance of finding the correct bait dosage and indicates the need for strategies to reduce the  
389 amount of spilled grain after harvest as noted above.

390 Most mice died within about 24 h of consumption of ZnP-coated grains, although several  
391 animals (14%) died between 39 and 112 h later. This bimodal pattern of mortality reflects the  
392 previously reported acute action of ZnP in some mice and the more prolonged effects that reflect  
393 organ damage in others (Khan and Schell, [https://www.msdtvetmanual.com/toxicology/rodenticide-](https://www.msdtvetmanual.com/toxicology/rodenticide-poisoning/zinc-phosphide)  
394 [poisoning/zinc-phosphide](https://www.msdtvetmanual.com/toxicology/rodenticide-poisoning/zinc-phosphide)). Our observations of the clinical signs of toxicity due to ZnP poisoning  
395 reflect strongly those described previously by Mason and Littin [32].

396 Our laboratory experiments included more background food than that required for  
397 metabolic maintenance and raises questions about how wild mice forage. For example, in the  
398 complex conditions found in farmer's fields (e.g. growing crops, crop stubble, weeds, other food  
399 sources, [33]), it is unknown how mice might locate and select the food they consume, including  
400 poisoned grains when applied at 1 kg/ha (2-3 grains/m<sup>2</sup>). In zero- and no-till grain cropping systems,  
401 spilt grain remaining on the ground immediately post-harvest has been estimated at 20-130 kg/ha  
402 (up to ~390 grains/m<sup>2</sup>), with degradation occurring progressively in the subsequent three to four  
403 months to less than 4 kg/ha (up to ~12 grains/m<sup>2</sup>; Ruscoe et al. unpublished data). Therefore, even if  
404 ZnP application rates were higher, it is likely that mice may not encounter ZnP-treated grain amongst  
405 existing spilt grain or other abundant food sources in the field. This means that farmers need  
406 strategies to improve the effectiveness of ZnP bait against varying background food quantities to  
407 prevent high application rates or repeated applications. Understanding these factors and the roles  
408 they play in bait uptake, require further research, especially in complex CA systems, and in situations  
409 where abundant alternative food exists.



410

411 **5 CONCLUSION**

412

413 This laboratory-based study has shown that wild house mice will rapidly switch their consumption of  
414 one grain type to an alternative on the first night of presentation, and that they prefer cereal grains  
415 over lentils. We have also demonstrated that wild house mice will consume different types of barley  
416 grains (common barley, malted barley with or without husk) coated with approximately 1 mg ZnP,  
417 but the efficacy of this dose is only about 50% when presented as an alternative to a cereal grain  
418 compared to in the presence of lentils (87% mortality). Consumption of a sub-lethal dose of ZnP-  
419 coated grain also resulted in rapid development of behavioural aversion. We conclude that the  
420 currently registered dose rate of ZnP (25 g ZnP/kg wheat; ~ 1 mg ZnP per grain) in Australia should be  
421 re-evaluated to determine what factors may be contributing to variation in efficacy. Further field  
422 research is also required to understand the complex association between ZnP dose, and quantity and  
423 quality of background food on efficacy of ZnP baits.

424

425 **ACKNOWLEDGEMENTS**

426

427 This work was supported by the Grains Research and Development Corporation (GRDC) through  
428 project CSP1804-012RTX, with support from CSIRO Agriculture & Food. We sincerely thank farmers  
429 for allowing us to trap mice on their properties for this experiment. We thank Ken Young and Leigh  
430 Nelson (GRDC) for ongoing support. All experiments and procedures were approved by the CSIRO  
431 Wildlife, Livestock and Laboratory Animal - Animal Ethics Committee and conform to the Australian  
432 Code of Practice for the Care and Use of Animals for Scientific Purposes (Approval No 2017-28 and  
433 2018-22).

434

435 **CONFLICT OF INTEREST DECLARATION**

436

437 The authors have no conflicts of interest to declare.

438

439 **REFERENCES**

440

- 441 1. Singleton GR, Brown PR, Pech RP, Jacob J, Mutze GJ, Krebs CJ. One hundred years of eruptions of  
442 house mice in Australia - a natural biological curio. *Biological Journal of the Linnean Society*  
443 **84**:617-27 (2005).
- 444 2. Caughley J, Monamy V, Heiden K. Impact of the 1993 mouse plague. Canberra, Australia: GRDC;  
445 1994 73 p.
- 446 3. Caughley J, Donkin C, Strong K, editors. Managing mouse plagues in rural Australia. Proceedings  
447 of the 18th Vertebrate Pest Conference; 1998; Costa Mesa, California. Davis: University of  
448 California.
- 449 4. McLeod R. Counting the Cost: Impact of Invasive Animals in Australia 2004. Canberra:  
450 Cooperative Research Centre for Pest Animal Control; 2004. 70 p.
- 451 5. Meerburg BG, Singleton GR, Kijlstra A. Rodent-borne diseases and their risks for public health.  
452 *Critical Reviews in Microbiology* **35**:221-70 (2009) 10.1080/10408410902989837.
- 453 6. Singleton GR, Brown PR, Jacob J, Aplin KP, Sudarmaji. Unwanted and unintended effects of  
454 culling: A case for ecologically-based rodent management. *Integrative Zoology* **2**:247-59 (2007)  
455 10.1111/j.1749-4877.2007.00067.x.
- 456 7. Parker R, Hannan-Jones MA. The potential of zinc phosphide for mouse plague control in  
457 Australia. Brisbane: Queensland Department of Natural Resources; 1996
- 458 8. Brown PR, Chambers LK, Singleton GR. Pre-sowing control of house mice (*Mus domesticus*) using  
459 zinc phosphide: efficacy and potential non-target effects. *Wildlife Research* **29**:27-37 (2002).
- 460 9. Mutze GJ, Sinclair R. Efficacy of zinc phosphide, strychnine and chlorpyrifos as rodenticides for  
461 the control of house mice in South Australian cereal crops. *Wildlife Research* **31**:249-57 (2004).

- 462 10. Staples L, Smith M, Pontin K, Hunt W, editors. Use of zinc phosphide to overcome rodent  
463 infestations. Stored grain in Australia 2003 Proceedings of the Australian Postharvest Technical  
464 Conference; 2003 25-27 June 2003; Canberra: CSIRO Stored Grain Research Laboratory; 2003.
- 465 11. Sugihara RT, Tobin ME, Koehler AE. Zinc phosphide baits and prebaiting for controlling rats in  
466 Hawaii sugarcane. *Journal of Wildlife Management* **59**:882-9 (1995)
- 467 12. Sterner RT, Ramey CA, Edge WD, Manning T, Wolff JO, Fagerstone KA. Efficacy of zinc phosphide  
468 baits to control voles in alfalfa - an enclosure study. *Crop Protection* **15**:727-34 (1996).
- 469 13. Mathur RP. Effectiveness of various rodent control measures in cereal crops and plantations in  
470 India. *Belgian Journal of Zoology* **127**:137-44 (1997).
- 471 14. Stuart AM, Prescott CV, Singleton GR, Joshi RC. Knowledge, attitudes and practices of farmers on  
472 rodent pests and their management in the lowlands of the Sierra Madre Biodiversity Corridor,  
473 Philippines. *Crop Protection* **30**(2):147-54 (2011) 10.1016/j.cropro.2010.10.002.
- 474 15. Khan AA, Munir S, Shakoori AR. Development of under-ground baiting technique for control of  
475 rats in rice fields in Pakistan. *International Biodeterioration & Biodegradation* **42**:129-34 (1998).
- 476 16. Leung LKP, Seth S, Starr CR, El S, Russell IW, King CA, et al. Selecting bait base to increase uptake  
477 of zinc phosphide and warfarin rodenticide baits. *Crop Protection* **26**(8):1281-6 (2007)  
478 <https://doi.org/10.1016/j.cropro.2006.11.002>.
- 479 17. Jacob J, Budde M, Leukers A. Efficacy and attractiveness of zinc phosphide bait in common voles  
480 (*Microtus arvalis*). *Pest Management Science* **66**(2):132-6 (2010) 10.1002/ps.1841.
- 481 18. Rivera DF, Smith M, Staples L, Leung LKP. Effect of zinc phosphide baiting on canefield rat  
482 populations in teak. *Crop Protection* **27**(3-5):877-81 (2008) 10.1016/j.cropro.2007.10.010.
- 483 19. Twigg LE, Martin GR, Stevens TS. Effect of lengthy storage on the palatability and efficacy of zinc  
484 phosphide wheat bait used for controlling house mice. *WILDLIFE RESEARCH* **29**(2):141-9 (2002)  
485 10.1071/WR00078.
- 486 20. Brown PR. Short- and long-term demographic changes in house mouse populations after control  
487 in dryland farming systems in Australia. *Wildlife Research* **33**:457-66 (2006).

- 488 21. Llewellyn RS, D’Emden FH, Kuehne G. Extensive use of no-tillage in grain growing regions of  
489 Australia. *Field Crops Research* **132**:204-12 (2012) <https://doi.org/10.1016/j.fcr.2012.03.013>.
- 490 22. Ruscoe WA, Brown PR, Henry S, van de Weyer N, Robinson F, Hinds LA, et al. Conservation  
491 agriculture practices have changed habitat use by rodent pests: implications for management of  
492 feral house mice. *Journal of Pest Science*: In press (2021) [https://doi.org/10.1007/s10340-021-](https://doi.org/10.1007/s10340-021-01370-7)  
493 [01370-7](https://doi.org/10.1007/s10340-021-01370-7).
- 494 23. Robards GE, Saunders G. Food preferences of house mice (*Mus domesticus*) and their  
495 implications for control strategies. *Wildlife Research* **25**(6):595-601 (1998) 10.1071/WR97109.
- 496 24. Rowe FP, Bradfield A, Redfern R. Food preference of wild house mice (*Mus musculus* L.). *Journal*  
497 *of Hygiene, Cambridge* **73**:473-8 (1974).
- 498 25. Pennycuik PR, Cowan R. Odor and food preference of house mice, *Mus musculus*. *Australian*  
499 *Journal of Zoology* **38**(3):241-7 (1990) 10.1071/ZO9900241.
- 500 26. Fuerst EP, Morris CF, Dasgupta N, McLean DJ. Optimizing experimental design using the house  
501 mouse (*Mus musculus* L.) as a model for determining grain feeding preferences. *Journal of Food*  
502 *Science* **78**(10):S1614-S20 (2013) <https://doi.org/10.1111/1750-3841.12245>.
- 503 27. Takács S, Musso AE, Gries R, Rozenberg E, Borden JH, Brodie B, et al. New food baits for trapping  
504 house mice, black rats and brown rats. *Applied Animal Behaviour Science* **200**:130-5 (2018)  
505 <https://doi.org/10.1016/j.applanim.2017.11.011>.
- 506 28. R Core Team. R: A Language and Environment for Statistical Computing. Vienna, Austria: R  
507 Foundation for Statistical Computing; 2020.
- 508 29. Bates D, Mächler M, Bolker B, Walker S. Fitting linear mixed-effects models using lme4. *Journal of*  
509 *Statistical Software* **67**(1):1-48 (2015) 10.18637/jss.v067.i01.
- 510 30. Singleton GR, Krebs CJ. The secret world of wild mice. In: Fox JG, Davisson MT, Quimby FW,  
511 Barthold SW, Newcomer CE, Smith AL, editors. *The Mouse in Biomedical Research* (Second  
512 Edition). Burlington: Academic Press; 2007. p. 25-51.

513 31. Li J, Marsh RE. LD determination of zinc phosphide toxicity for house mice and albino laboratory  
514 mice. In: Crabb AC, Marsh RE, editors. Proceedings of the 13th Vertebrate Pest Conference:  
515 University of California; 1988. p. 91-4.

516 32. Mason G, Littin KE. The humaneness of rodent pest control. *Animal Welfare* **12**:1-37 (2003).

517 33. Tann CR, Singleton GR, Coman BC. Diet of the house mouse (*Mus domesticus*) in the mallee  
518 wheatlands of north-western Victoria. *Wildlife Research* **18**:1-12 (1991).

519

520

521

522 **Tables**

523

524 **Table 1.** Treatment groups (n = 9) received one of three background grain types for two weeks and  
 525 then a choice of one alternative grain types for five days for Experiment 1. Each treatment group  
 526 comprised 10 mice (5 males, 5 females).

| Treatment | Mice          | Background food type | Alternative food type      |
|-----------|---------------|----------------------|----------------------------|
| 1         | 10 (5 ♂, 5 ♀) | Common wheat         | Durum wheat (high protein) |
| 2         | 10 (5 ♂, 5 ♀) | Common wheat         | Malt Barley with husk      |
| 3         | 10 (5 ♂, 5 ♀) | Common wheat         | Lentils                    |
| 4         | 10 (5 ♂, 5 ♀) | Barley with husk     | Durum wheat (high protein) |
| 5         | 10 (5 ♂, 5 ♀) | Barley with husk     | Malt Barley with husk      |
| 6         | 10 (5 ♂, 5 ♀) | Barley with husk     | Lentils                    |
| 7         | 10 (5 ♂, 5 ♀) | Lentils              | Durum wheat (high protein) |
| 8         | 10 (5 ♂, 5 ♀) | Lentils              | Malt Barley with husk      |
| 9         | 10 (5 ♂, 5 ♀) | Lentils              | Lentils                    |

527

528

529 **Table 2.** Protein, sugar, energy (kJ), dietary fibre and total carbohydrate content (g/100 g) for each  
 530 grain type (USDA, <https://fdc.nal.usda.gov/fdc-app.html#/food-search>, FSANZ,  
 531 <https://www.foodstandards.gov.au/science/monitoringnutrients/afcd/Pages/fooddetails.aspx>).

| Grain type                             | Protein   | Sugar   | Energy (kJ) | Dietary fibre | Total carbohydrate |
|----------------------------------------|-----------|---------|-------------|---------------|--------------------|
| Common wheat, <i>Triticum aestivum</i> | 11.5-15.1 | 0.4-1.3 | 1367        | 10.6-11.4     | 58.3-71.2          |
| Durum wheat, <i>Triticum durum</i>     | 13.7      | 0.5     | 1420        | -             | 71.1               |
| Barley, <i>Hordeum vulgare</i>         | 10.1-12.5 | 0.8-1.0 | 1428-1480   | 13.1-17.3     | 60.6-73.5          |
| Barley Malt                            | 10.3      | 0.8     | 1510        | 7.1           | 78.3               |
| Lentil, <i>Lens culinaris</i>          | 23.0-23.9 | 1.8-2.7 | 1364-1500   | 10.8-13.7     | 45.7-63.1          |

532

533

534 **Table 3.** Treatment groups (n = 9) received one of three background grain types for two weeks and  
 535 then a choice of one alternative grain types for five days for Experiment 2. Each treatment group  
 536 comprised 10 mice (5 males, 5 females). Mice were provided with a different background food type  
 537 from Experiment 1.

| Treatment | Mice          | Non-toxic treatment<br>Background food type | Toxic treatment<br>Zinc phosphide treatment |
|-----------|---------------|---------------------------------------------|---------------------------------------------|
| 1         | 10 (5 ♂, 5 ♀) | Wheat                                       | Barley with husk                            |
| 2         | 10 (5 ♂, 5 ♀) | Wheat                                       | Malt barley with husk                       |
| 3         | 10 (5 ♂, 5 ♀) | Wheat                                       | Malt barley without husk                    |
| 4         | 10 (5 ♂, 5 ♀) | Barley with husk                            | Barley with husk                            |
| 5         | 10 (5 ♂, 5 ♀) | Barley with husk                            | Malt barley with husk                       |
| 6         | 10 (5 ♂, 5 ♀) | Barley with husk                            | Malt barley without husk                    |
| 7         | 10 (5 ♂, 5 ♀) | Lentils                                     | Barley with husk                            |
| 8         | 10 (5 ♂, 5 ♀) | Lentils                                     | Malt barley with husk                       |
| 9         | 10 (5 ♂, 5 ♀) | Lentils                                     | Malt barley without husk                    |

538

539 **Table 4.** Mortality (%) and time to death (h) of mice for each background grain type; minimum (Min),  
540 maximum (Max), median and mean  $\pm$  SD time to intervention. n = number of mice humanely  
541 killed/total number of mice in treatment group.

| Background grain<br>type | Percent<br>mortality (%) | Time to death (h) |     |        |      |          | n     |
|--------------------------|--------------------------|-------------------|-----|--------|------|----------|-------|
|                          |                          | Min               | Max | Median | Mean | $\pm$ SD |       |
| Lentils                  | 86.7                     | 7                 | 47  | 18     | 20.5 | 8.8      | 26/30 |
| Barley                   | 53.3                     | 5                 | 66  | 15     | 23.0 | 19.1     | 16/30 |
| Wheat                    | 48.3                     | 4                 | 112 | 21     | 31.7 | 30.1     | 14/29 |

542

543

544

545 **Figures**

546

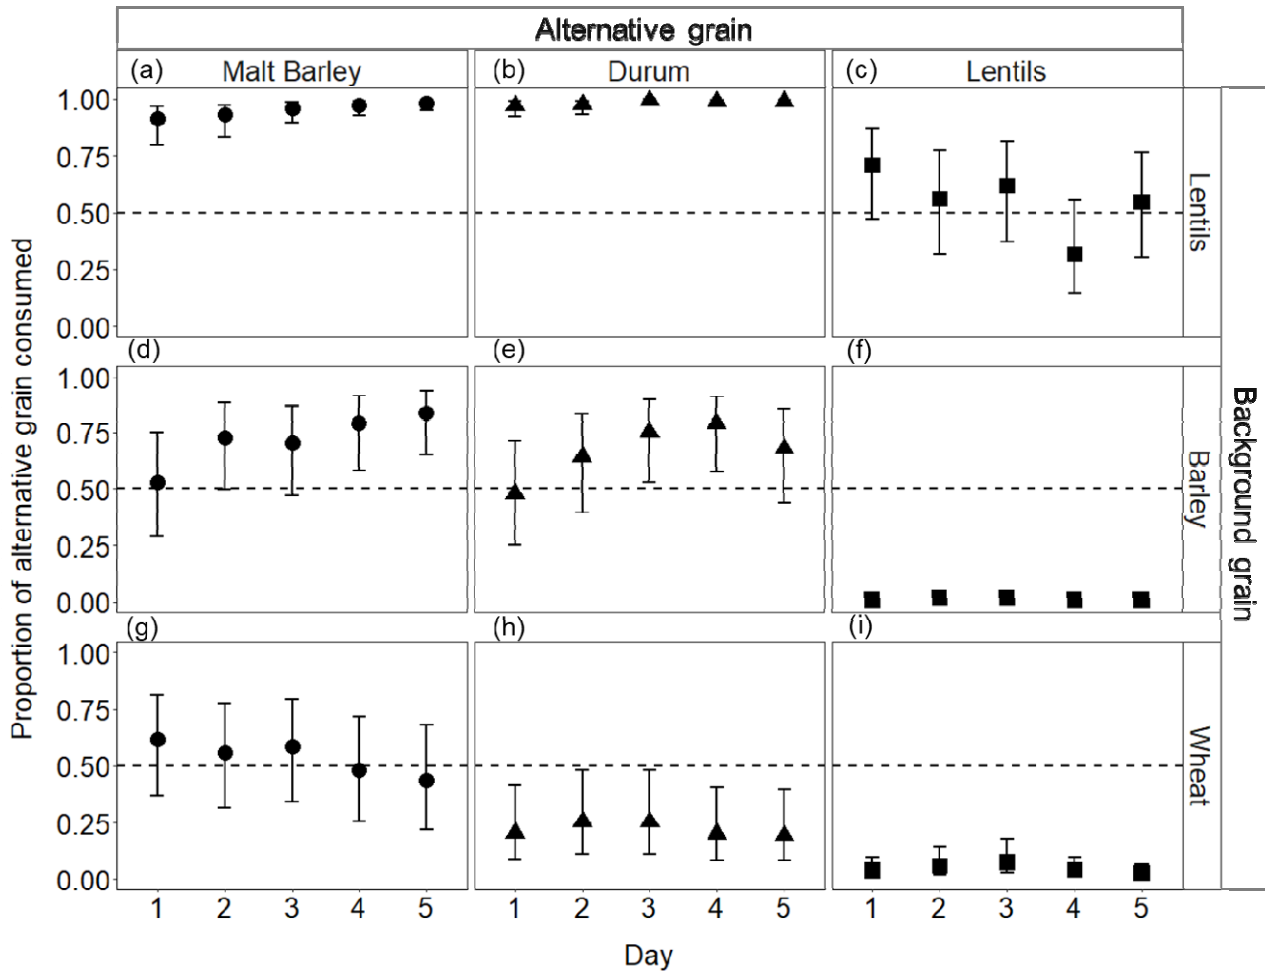

547 **Figure 1.** The proportion of alternative grain (a, d, g - malt barley with husk (◻); b, e, h - durum wheat  
 548 (▲); c, f, i - lentils (■)) consumed by mice (n = 10 per group) established on different background grains (a, b, c - lentils; d, e, f – barley with husk; g, h, i - common wheat) over 5 days. A value of “0”  
 549 indicates strong preference to background grain, “0.5” indicates no preference (represented by  
 550 dashed line) and “1” indicates strong preference for alternative grain. Shapes (◻, ▲, and ■) represent  
 551 estimates of fixed effects (individual mice as random effects), error bars represent 95% CI.  
 552

553

554

555

556

557

558



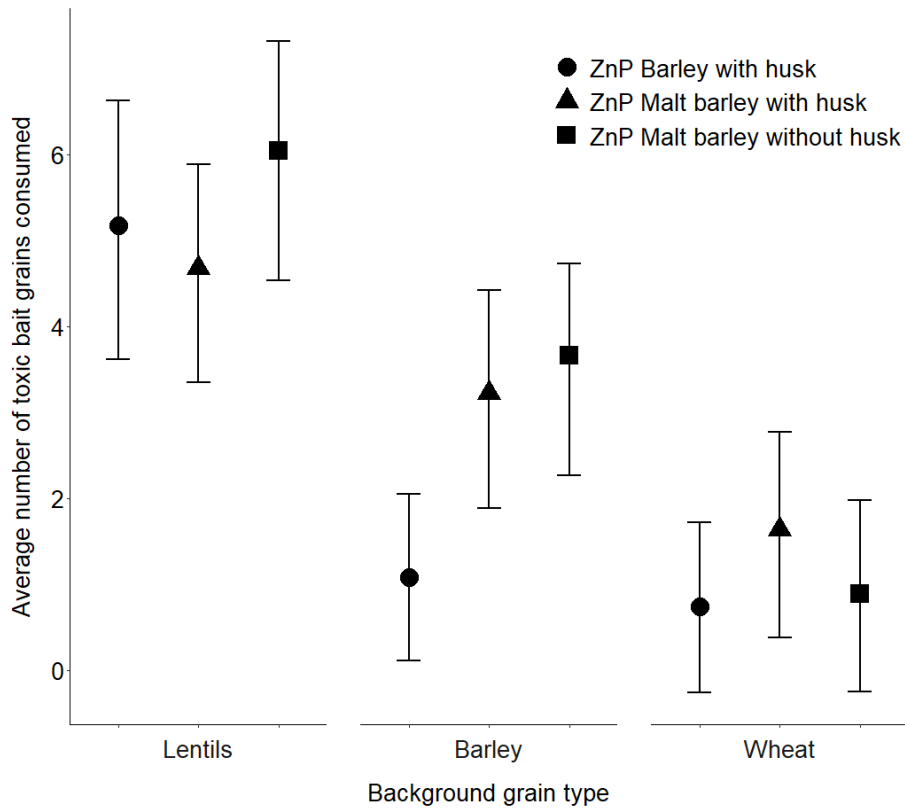

559

560

561 **Figure 2.** Number (Mean  $\pm$  95% CI) of ZnP-coated grains (barley with husk (●), malt barley with husk  
562 (▲) or malt barley without husk (■)), consumed by mice (n = 10) over three nights while held on  
563 either lentil, barley with husk or wheat background. Shapes (●, ▲, and ■) represent estimates of  
564 fixed effects (individual mice as random effects).  
565

566

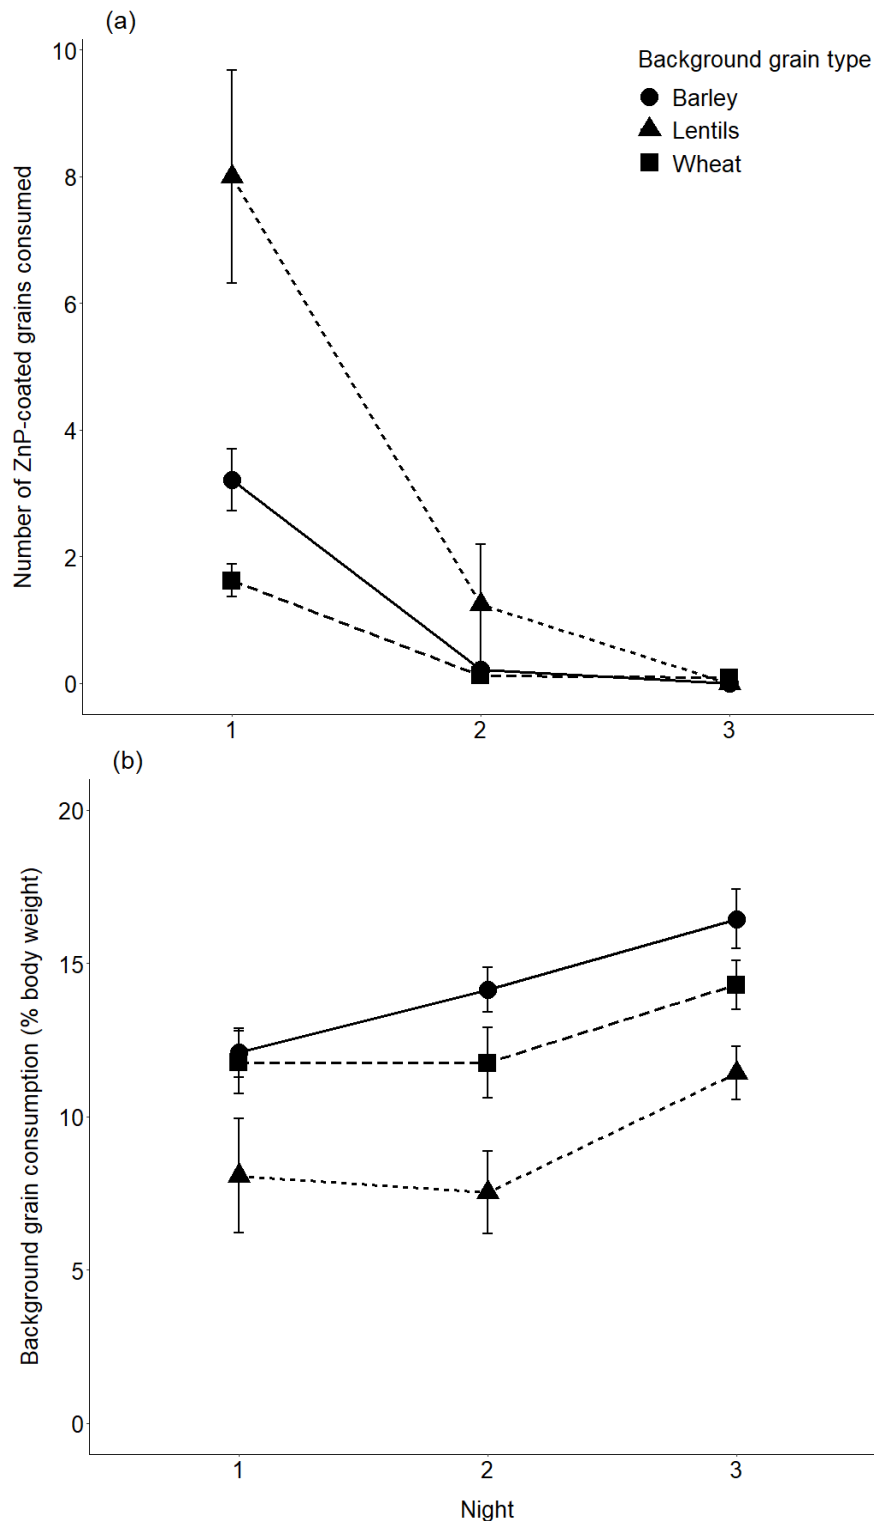

567 **Figure 3.** (a) Number (Mean  $\pm$  SE) of ZnP-coated grains consumed by mice that did not die while held  
568 on barley (n = 14 mice), lentils (n = 4 mice) and wheat (n = 16 mice) background food groups over  
569 three nights. (b) Amount (% body weight; Mean  $\pm$  SD) of background food eaten by these surviving  
570 mice over three nights.

571

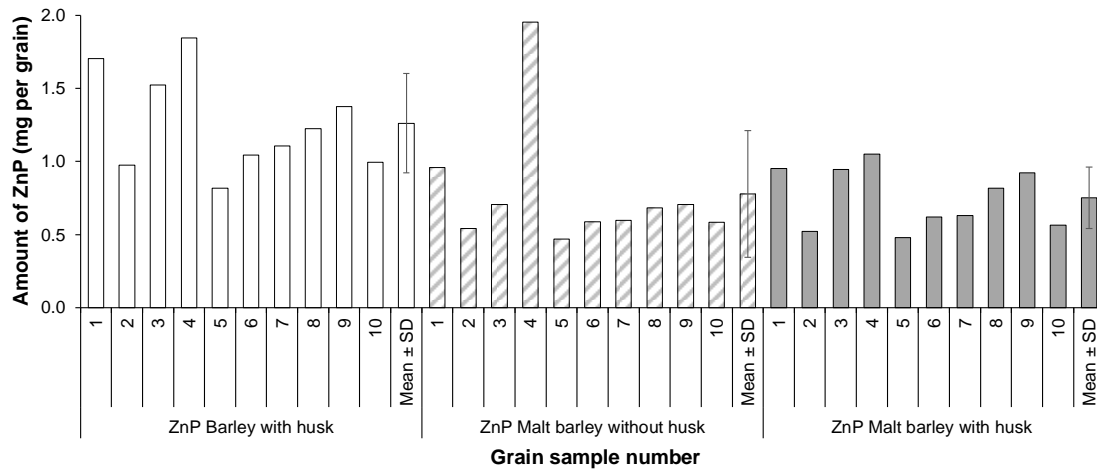

572

573

574

**Figure 4.** Amount of ZnP on individual grains (mg per grain) (n = 10 grains analysed per grain type), and overall average (Mean ± SD) for each type.
